# 1 Parasite histones mediate leak and coagulopathy in cerebral malaria

2

3 Christopher A Moxon<sup>1,2\*†</sup>, Yasir Alhamdi<sup>1†</sup>, Janet Storm<sup>3</sup>, Julien MH Toh<sup>4</sup>, Joo Yeon Ko<sup>5</sup>,  
4 George Murphy<sup>6</sup>, Terrie E Taylor<sup>7,8</sup>, Karl B Seydel<sup>5,6</sup>, Sam Kampondeni<sup>9</sup>, Michael Potchen<sup>10</sup>,  
5 James S. O'Donnell<sup>11</sup>, Niamh O'Regan<sup>11</sup>, Guozheng Wang<sup>1</sup>, Guillermo García-Cardena<sup>12</sup>,  
6 Malcolm Molyneux<sup>3,13</sup>, Alister Craig<sup>3</sup>, Simon T Abrams<sup>1‡</sup>, Cheng-Hock Toh<sup>1‡</sup>

7

## 8 **Affiliations:**

9 <sup>1</sup>Institute of Infection and Global Health, University of Liverpool, UK

10 <sup>2</sup>Wellcome Centre for Integrative Parasitology, Institute of Infection, Immunity  
11 and Inflammation, College of Medical Veterinary & Life Sciences, University of Glasgow, UK

12 <sup>3</sup>Liverpool School of Tropical Medicine, Liverpool, UK

13 <sup>4</sup>University of Sheffield Medical School, UK

14 <sup>5</sup>Department of Dermatology, Hanyang University Hospital and Hanyang University College  
15 of Medicine, Seoul, South Korea

16 <sup>6</sup>Program in Dermatopathology, Department of Pathology, Brigham and Women's Hospital,  
17 Harvard Medical School, Boston, MA, USA

18 <sup>7</sup>College of Osteopathic Medicine, Michigan State University, East Lansing, USA

19 <sup>8</sup>Blantyre Malaria Project, University of Malawi College of Medicine, Blantyre, Malawi

20 <sup>9</sup>University of Malawi College of Medicine, Blantyre, Malawi

21 <sup>10</sup>Univeristy of Rochester, Department of Radiology, Rochester, NY, USA

22 <sup>11</sup>Irish Centre for Vascular Biology, Royal College of Surgeons in Ireland, Dublin, Ireland.

23 <sup>12</sup>Center for Excellence in Vascular Biology, Department of Pathology, Brigham and  
24 Women's Hospital and Harvard Medical School, Boston, MA, USA

25 <sup>13</sup>Malawi-Liverpool-Wellcome Clinical Research Programme, University of Malawi College of  
26 Medicine, Blantyre, Malawi

27

28 \*To whom correspondence should be addressed: [christopher.moxon@glasgow.ac.uk](mailto:christopher.moxon@glasgow.ac.uk)

29 †These authors contributed equally to this work, ‡These authors contributed equally to this  
30 work

31

32 Short Title: Histones in cerebral malaria

33

34

35 Keywords: Malaria, Severe, Cerebral, Endothelium, coagulation, brain, swelling, blood brain  
36 barrier, histones

37

38

39

40

41

42

43 **Abstract:** Coagulopathy and leak, specific to the brain vasculature, are central pathogenetic  
44 components of cerebral malaria (CM). It is unclear how the parasite, *Plasmodium falciparum*,  
45 triggers these processes. Extracellular histones, released from damaged host cells, bind to cell  
46 membranes, causing coagulation activation, platelet aggregation and vascular leak in diverse  
47 critical illnesses. In CM patients, serum histones correlate with fibrin formation,  
48 thrombocytopenia, and endothelial activation; predicting brain swelling on MRI and fatal  
49 outcome. Post-mortem, histones bind to the luminal vascular surface, co-localizing with *P.*  
50 *falciparum*-infected erythrocytes (IE), and with thrombosis and leak. Purified *P.*  
51 *falciparum* histones or serum from patients with CM cause toxicity and barrier disruption in  
52 cultured human brain endothelial cells, reversed by anti-histone antibodies and non-  
53 anticoagulant heparin. These data implicate parasite histones as a key trigger of fatal brain  
54 swelling in CM. Neutralizing histones with agents such as non-anticoagulant heparin warrant  
55 exploration to prevent brain swelling and improve outcome.

56  
57  
58  
59  
60  
61  
62  
63  
64  
65  
66  
67  
68  
69  
70  
71  
72  
73  
74  
75  
76  
77  
78  
79  
80  
81  
82  
83  
84  
85  
86  
87

## 88 Introduction

89 Cerebral malaria (CM) is a severe complication of *Plasmodium falciparum* infection. Despite  
90 effective antimalarial drugs, 10-20% of children developing CM die (1), contributing to  
91 400,000 malarial deaths per year, mostly in children in sub-Saharan Africa (2). Recent MRI  
92 studies implicate blood brain barrier (BBB) breakdown and brain swelling in the causal  
93 pathway to death (3, 4). Death typically occurs in the first 24 hours after admission (5), with  
94 children who do not reach critical levels of brain swelling frequently recovering rapidly. BBB  
95 stabilization, through targeting causal pathways to vascular leak in the brain, could halt this  
96 brain swelling and reduce mortality.

97

98 A defining feature of CM is cytoadherence of *P. falciparum* infected erythrocytes (IE) to  
99 endothelial cells (EC) and sequestration in the microvasculature (1). *In vivo* retinal imaging (6,  
100 7), post-mortem histology (8, 9) and *in vitro* data (10) demonstrate spatial-temporal links  
101 between sequestration and microvascular leak and thrombosis, and coagulopathy predicts  
102 fatal outcome in CM (11, 12). Post-mortem studies in African children demonstrate  
103 sequestration in multiple organs, whereas leak and coagulopathy are most prominent in the  
104 brain (9, 13, 14); implying that sequestration provides a parasite stimulus for vascular leak  
105 and coagulopathy and that the response to this stimulus is different in the brain (8, 15). The  
106 nature of this parasite stimulus remains unclear.

107

108 Extracellular histones, released by damaged or immune activated host cells have emerged as  
109 critical EC damage mediators in diverse severe illnesses including sepsis (16), inflammatory  
110 conditions (17) and trauma (18). Hallmark features of histone toxicity are thrombocytopenia  
111 (19) and microvascular thrombosis and leak (16, 18). In patients with sepsis or trauma, histone  
112 levels correlate with clinical severity scores (20), thrombocytopenia (19), coagulation  
113 activation (18, 20, 21) and predict outcome (22). In animal models of sepsis or trauma, the  
114 release of extracellular histones are causal in these processes and in fatal outcome, which are  
115 prevented by anti-histone antibodies (18, 20, 23), heparins, including non-anticoagulant  
116 heparins (24) (which neutralize histones) and by activated protein C (aPC, which degrades  
117 histones) (16). In mice, infusion of exogenous histones of >30mg/kg are toxic and of >60mg/kg  
118 are fatal; histologically histones are observed to bind to the endothelium, associated with  
119 microvascular coagulopathy and vascular leak (22). *In vitro*, histone binding to the EC  
120 membrane causes toxicity and barrier disruption (22, 23). The cationic domain of histones  
121 also induces Weibel Palade body exocytosis, endothelial activation and thrombocytopenia  
122 through platelet aggregation on von Willebrand Factor strings (25). Histones further induce a  
123 procoagulant phenotype through upregulation of endothelial tissue factor (26). By an  
124 unknown mechanism, histones decrease cell surface thrombomodulin *in vitro* (27), and  
125 induce thrombomodulin shedding *in vivo* (18).

126

127 Given the striking similarities between the vascular leak, coagulopathy and thrombocytopenia  
128 induced by histones in other conditions (16, 22) and those at sites of sequestration in CM, in

129 particular the brain (8, 9, 14), we hypothesized that histones might be an important causal  
130 factor in CM pathogenesis. *P. falciparum*, as mammalian cells, contains histones (H2A, H2A.Z,  
131 H2B, H3, H4), packaged in nucleosomes with DNA. Following sequestration, intraerythrocytic  
132 merozoites multiply 16-24 times to form a schizont, increasing nuclear material, including  
133 histones, by an order of magnitude. Schizonts rupture releasing their contents, extruding *P.*  
134 *falciparum* histones *in vitro* into culture medium (28). Similar to mammalian histones, on  
135 cultured ECs, purified plasmodial histones cause inflammatory pathway activation, toxicity  
136 and barrier disruption (28). Therefore, histones may link sequestration and vascular  
137 pathology in CM; sequestration bringing histone-packed schizonts in contact with the  
138 endothelial surface, concentrating exposure to extruded histones many fold. The brain might  
139 be particularly vulnerable to this mechanism. Firstly, there are high levels of sequestration in  
140 the brain in CM (14, 29, 30). Secondly the brain may have reduced capacity to breakdown  
141 histones: the human brain has reduced innate capacity to produce activated protein C (aPC)  
142 (31), owing to low constitutive thrombomodulin and endothelial protein C receptor (EPCR)  
143 expression (32, 33), the receptors involved in aPC production. Moreover, parasite variants  
144 associated with the development of CM utilize EPCR as a binding receptor (34, 35), interfering  
145 with its function and the production of aPC (35, 36). Thus histones released by IE would be  
146 predicted to concentrate and be particularly toxic in the brain.

147  
148 Supporting that *P. falciparum* histones may be released in patients with malaria, nucleosomes  
149 have been detected in the plasma of South-East Asian adults with malaria, which were higher  
150 in severe cases (28). However the association between nucleosomes (which have minimal  
151 toxicity (21)) and free histones is variable and it was not identified whether these  
152 nucleosomes were of host or parasite origin, or whether they were active. Thus, it remains  
153 uncertain whether significant levels of parasite histones are produced *in vivo* in patients with  
154 malaria and there are no data assessing the association between histones and clinical or  
155 laboratory indicators of severity or coagulation and leak, nor data to assess whether  
156 plasmodial histones bind in the vasculature at sites of sequestration.

157  
158 Here we address these gaps. Using detailed laboratory, clinical and MRI imaging data we link  
159 histone levels in the blood to fibrin formation, endothelial activation and thrombocytopenia  
160 and to brain swelling and fatal outcome. Through post-mortem brain tissue samples from CM  
161 cases we show marked correlation between sequestration and the deposition of histones on  
162 the endothelial surface, and co-localisation with thrombosis and leak in the brain vasculature.  
163 We then demonstrate a causal role of *P. falciparum* histones in these processes through *ex*  
164 *vivo* experiments.

## 165 166 **Methods**

### 167 *Patients and blood samples*

168 Children aged 6 months – 16 years were recruited at Queen Elizabeth Central Hospital,  
169 Blantyre Malawi between January 2010 and August 2011. Inclusion criteria are described

170 previously (8). Children who met WHO criteria for CM underwent funduscopy examination  
171 by an ophthalmologist: characteristic retinal changes indicate sequestration of IE in the  
172 brain(37) and distinguish retinopathy-positive CM with stringently defined CM (CM-pos) from  
173 cases with retinopathy negative CM (CM-neg), who are more likely to have an alternative  
174 diagnosis (1), to which malaria makes a variable contribution (38) and thus may have a  
175 different coma aetiology. Uncomplicated malaria and mild aparasitemic febrile illness cases  
176 were children with acute febrile illness without signs of organ compromise recruited from the  
177 hospital Accident and Emergency department (Emergency Room). Healthy controls were  
178 children attending elective surgery. Venous blood was collected at enrolment into plain or  
179 sodium citrate tubes and serum and plasma prepared as previously described (39), stored at  
180 -80°C until assays were performed. Circulating histone levels were quantified by a custom  
181 immunoblot assay (18-20) and Osteoprotegrin, Fibrin monomers, F1+2 fragment by ELISA as  
182 described previously (8, 11, 40).

183

184 There were no prior data on histone levels in CM on which to base a power calculation. The  
185 number of samples to be analysed was determined *a priori*, at the time of study design,  
186 based on the availability of samples and deemed to be appropriate based on comparison of  
187 histones levels in other conditions. All samples were processed and analysed together.

188

#### 189 *MRI scans and scoring of brain swelling*

190 MRI images were acquired using a 0.35-Tesla Signa Ovation Excite MRI scanner (General  
191 Electric). Images were scored independently by two radiologists who were blinded to  
192 patient disease group and outcome. A score from 1 – 8 was assigned to each scan, based on  
193 cerebral hemisphere swelling, using pre-specified criteria – described previously (3). We  
194 divided patients into 4 groups on the basis of this 8-point score: Score 1- 3, No brain  
195 swelling; 4-5, mild brain swelling; 6, moderate brain swelling and 7-8, severe brain swelling.  
196 A number of children did not have MRI scans. When this was because they recovered from  
197 coma within 12 hours we deemed it likely that they did not have significant brain swelling  
198 and included them in category 1. Other MRI scans were not performed for several reasons  
199 (e.g. patient clinical unstable, equipment issues), we could not reasonably assign a category,  
200 and missing data were handled by listwise deletion.

201

#### 202 *Isolation and purification of *P. falciparum* histones*

203 ITG mature IE were lysed with saponin and *P. falciparum* histones (H2A, H2B, H3, H4) purified  
204 using a Kit (Active Motif). Protein concentrations were determined by Biorad Protein Assay,  
205 using bovine serum albumin and purified calf histones (Roche) standards and purity examined  
206 by SDS-PAGE and Coomassie staining (>95% pure; Fig. S3)

#### 207 *Mass spectrometry sample preparation*

208 Purified *P. falciparum* and human histones (New England Biolabs) (6µg), normal serum,  
209 histone spiked serum and CM patient serum were separated by 15% SDS-PAGE and stained

210 with Coomassie brilliant blue. The excised gel slices (<35kDa) from SDS-PAGE, were cut into  
211 1mm<sup>3</sup> plugs, transferred to a microtube and fully de-stained using 25mM Ambic alternately  
212 with Ambic/MeCN (2:1). Cysteine reduction was performed by adding 100μL DTT solution  
213 (1.5mg/mL) and incubated at 60°C for 60 min. Samples were centrifuged and the supernatant  
214 was discarded. Alkylation was performed by the addition of 100μL iodoacetamide (10mg/mL)  
215 for 45 min (protected from light). Samples were centrifuged and the supernatant discarded.  
216 Gel plugs were then washed with Ambic (25mM) for 15min at 37°C. To fully dehydrate the gel  
217 plugs, samples were washed with MeCN. In-gel digestion was performed by adding 100μL of  
218 trypsin (12.5ng/μL in 25mM Ambic) to each sample with overnight incubation at 37°C, and  
219 reactions terminated by the addition of 10μL formic acid (1% final concentration). The  
220 solutions surrounding the gel plugs (containing the tryptic peptides) were retained for  
221 analysis. To extract additional peptides from the gel plugs, a further incubation with a solution  
222 containing water:MeCN:FA (50:49:1) and then MeCN:FA (80:19:1) was performed. Finally,  
223 solutions were pooled and dried to a 10μL solution.

224

#### 225 *Liquid Chromatography-mass spectrometry analysis*

226 Analysis was performed using an Ultimate 3000 RSLC™ nano system (Thermo Scientific,  
227 Hemel Hempstead), coupled to a QExactive-Hf™ mass spectrometer (Thermo Scientific).  
228 Samples were loaded onto a trapping column (Thermo Scientific, PepMap100, C18, 300 μm X  
229 5 mm), using partial loop injection, for seven minutes at a flow rate of 9 μL/min with 0.1%  
230 (v/v) FA. Samples were then resolved on the analytical column (Easy-Spray C18 75 μm x 500  
231 mm 2 μm column) using a gradient of 97% A (0.1% formic acid) 3% B (99.9% ACN 0.1% formic  
232 acid) to 60% A 40% B over 15 min at a flow rate of 300 nL min<sup>-1</sup>. The data-dependent program  
233 used for data acquisition consisted of a 70,000 resolution full-scan MS scan (AGC set to 1 x  
234 10<sup>6</sup> ions, with a maximum fill time of 20ms) the 10 most abundant peaks were selected for  
235 MS/MS using a 35,000 resolution scan (AGC set to 1 x 10<sup>5</sup> ions with a maximum fill time of  
236 100ms) with an ion-selection window of 3 m/z and a normalized collision energy of 28. To  
237 avoid repeated selection of peptides for MS/MS the program used a 15 second dynamic  
238 exclusion window. Sequence alignment was performed in PEAKs software (v8.5) against both  
239 *P. falciparum* and *Homo sapiens* databases. Once species-specific peptides were identified  
240 they were further verified using Skyline analysis software for quantification (comparisons  
241 between the specific amino acid sequences of *P. falciparum* and *Homo sapiens* histone  
242 proteins illustrated in Fig S4).

243

#### 244 *Immunohistochemistry*

245 Brain tissue samples of parietal cortex were collected at autopsy from Malawian children  
246 dying with encephalopathic illness and were formalin fixed and paraffin embedded as  
247 described previously (9). Based on clinical information and autopsy findings the cause of  
248 death was determined for each case by a clinical pathologist. We used samples classified into  
249 one of 3 overall categories as defined previously (1): 1) Definitive CM (CM1 and CM2) –  
250 children who met the case definition for CM during life and who at death had sequestration

251 of IE in cerebral vessels and in whom no alternative cause of death was identified at autopsy;  
252 2) 'Faux CM' (CM3) – met the case definition for CM during life but who had no visible  
253 sequestration of IE in cerebral vessels and in whom at autopsy another cause of coma and  
254 death was identified in all cases; 3) Aparasitemic non-malarial coma comatose patients who  
255 had no detectible malaria parasites in blood or tissue.

256

257 Cortical sections (4µm in thickness) were stained for histones and fibrinogen. Heat-induced  
258 antigen retrieval in citrate buffer (pH 6.0) was performed prior to incubation with primary  
259 antibodies: anti-histone H3 (Abcam); anti-Fibrinogen (Thermofisher)). Bound primary  
260 antibody was detected with an immunoperoxidase kit (EnVision Plus; Dako). Negative  
261 controls without primary antibody were used for all samples to confirm specificity.  
262 Immunohistochemistry was performed on all cases by a single investigator blinded to  
263 histologic diagnosis. Slides were scored by 3 investigators blinded to histological classification.  
264 70 random vessels were scored from each slide. IE sequestration for each vessel was scored  
265 as: negative (0); positive but <50% of the vessel lumen (+) or >50% of the vessel lumen (++)  
266 Histone membrane staining for each vessel was scored as absent (0); weak (+) or strong (++)  
267 Fibrinogen extravasation as a marker of leak was scored for each vessel as absent or present.

268

269 There were no prior data on histone staining in post-mortem samples in CM or in other  
270 conditions. The numbers of samples to be stained and the numbers of vessels to be scored  
271 were based on numbers from previous studies comparing factors in CM. Numbers for staining  
272 and analysis were determined *a priori* and were not altered. Samples were stained together  
273 to avoid batch effects.

274

#### 275 *Endothelial cell culture, endothelial cell damage assays and barrier function assays*

276 Primary HBMEC (Cell Systems, US) were cultured in 1% gelatin-coated flasks, in Complete  
277 Medium containing 10% FBS (Cell Systems, US) as per manufacturer's instructions.

278

279 For toxicity assays, HBMEC were treated with either purified histones in Cell Systems media  
280 with 2% serum or serum from healthy controls or patients (diluted 1:1 with PBS) for 1 hour at  
281 37°C, under 5% CO<sub>2</sub>. Cell viability was determined by propidium iodide (PI) staining and  
282 quantified using flow cytometry. Cell toxicity in patient samples was calculated as the  
283 percentage of cells that were PI positive, subtracting the percentage of PI positive cells from  
284 the healthy donors from each sample. For anti-histone treatments, patient sera were pre-  
285 incubated for 10mins with anti-histone single-chain variable fragment (ahscFv; 200 µg/ml,  
286 synthesis described previously (18)) or with non-anticoagulant N-acetyl heparin (200 µg/ml;  
287 Sigma).

288

289 Transmembrane permeability of confluent HBMEC was analysed in a dual-chamber system  
290 (0.4 µM pore size; Millipore). HBMEC were treated with normal serum or patient serum  
291 (diluted 1:1 with PBS) for 1hr, replaced with horse radish peroxidase (HRP)-containing media.

292 Leaked HRP over 1hr was determined using TMB substrate (ThermoFisher) on a microplate  
293 reader (450nm). Permeability was expressed as a fold change compared to monolayers  
294 treated with pooled normal serum from healthy UK donors [RETH000685].

295

296 Biological replicates were defined as independent experiments on primary HBMEC, treated  
297 with independently purified batches of purified histones or with serum from different  
298 patients. We generally used 3 biological replicates for experiments, based on routine practice  
299 for *in vitro* assays. For the 0 and 75ug/ml of purified histones and for the healthy control and  
300 CM patients with high histones we performed 6 and 7 biological replicates. Additional  
301 replicates were as controls for comparison with the anti-histone scFv, heparin and CM-low  
302 groups; the comparison with the other groups was similar to that presented and was  
303 significant after the initial 3 replicates.

304

### 305 *In vitro* platelet aggregation

306 Platelets ( $2 \times 10^3/\mu\text{l}$ ) prepared from healthy donors were mixed with pooled plasma spiked  
307 with malarial histones. Platelet aggregation was determined optically at 405nm (Multiskan  
308 Spectrum plate reader, ThermoScientific) in a 96-well plate, over 15mins at 37°C. To  
309 normalize for differences in optical density between plasma samples each sample was  
310 blanked with plasma in the absence of platelets, allowing the specific changes in optical  
311 density induced by platelet aggregation to be determined.

312

### 313 *Statistical analysis*

314 Statistical analyses were performed using Stata (version 11; Statacorp) and Prism (version 8;  
315 GraphPad) software. Continuous variables were assumed to have normal or log normal  
316 distribution depending on their level of skewness. Differences between groups were  
317 compared using linear regression models. To adjust for multiple comparisons we used the  
318 Tukey (when comparing all groups to each other) or Dunnett tests (when comparing all groups  
319 to a control group). The association between histone levels and other variables was assessed  
320 by linear regression and expressed as correlation coefficients. For ordered categorical slide  
321 scoring data, the associations between histological classification, extent of sequestration and  
322 degree of fibrinogen extravasation were assessed by use of ordinal logistic regression models,  
323 controlling for clustering within cases and adjusting for any differences between scorers. All  
324 tests were two-tailed with a conventional 5% alpha-level.

325

326

## 327 **Results**

### 328 *Circulating concentrations of extracellular histones are elevated in cerebral malaria cases and* 329 *levels correlate with the degree of fibrin generation and with endothelial activation*

330 Clinical characteristics of the patients are detailed in Table 1. Compared with CM-pos, CM-  
331 neg patients had a higher haemoglobin and platelet count and lower lactate level and parasite  
332 count. To explore whether histones are released *in vivo* and whether levels were associated



333 with diagnosis, we measured circulating histones in serum samples taken from patients on  
334 admission. Histone concentrations were markedly higher in children with CM-pos than in  
335 children with CM-neg, non-CM encephalopathy, uncomplicated malaria, non-severe febrile  
336 illness or healthy controls (Fig 1A). These differences were not explained merely by an  
337 association with parasite density as there was only weak correlation between extracellular  
338 histone levels and peripheral parasite density ( $r=0.22$   $p=0.0044$ , Fig 1B) and there was no  
339 correlation between histone and histidine rich protein 2 levels (PfHRP2, a released parasite  
340 protein used as a marker of biomass [ $r=0.09$ ,  $p=0.25$ ]).

341  
342 To explore histones as a possible trigger for coagulation activation in CM we assessed the  
343 association between circulating histones and markers of *in vivo* fibrin formation and  
344 coagulation activation (11). In CM-pos cases, plasma fibrin monomer concentrations  
345 correlated with circulating histone levels ( $r=0.56$ ;  $p<0.001$ , Fig 1C) more strongly than with  
346 (log) peripheral parasite density ( $r=0.34$ ,  $p<0.001$ ), PfHRP2 ( $r=0.24$ ,  $p=0.013$ ), platelets ( $r=-$   
347  $0.18$ ,  $p=0.2$ ), lactate ( $r=0.33$ ,  $p<0.001$ ), blood glucose ( $r=0.08$   $p=0.58$ ) or haemoglobin  
348 ( $r=0.06$ ,  $p=0.89$ ). Circulating histone levels showed a moderate correlation with prothrombin  
349 fragment F1+2 (a marker of thrombin generation ( $r=0.34$ ,  $p<0.001$ ; Fig 1D)). Hence  
350 circulating histones better predict fibrin generation and coagulation activation than parasite  
351 density or other markers of disease severity.

352  
353 Histones cause Weibel Palade Body (WPB) exocytosis and thrombocytopenia in mice through  
354 endothelial activation and increased platelet adhesion (25). Here circulating histone  
355 concentration correlated negatively with platelet levels, weakly in the subgroup of children  
356 with retinopathy positive CM ( $r= -0.22$ ,  $p=0.0039$  [in whom thrombocytopenia was nearly  
357 universal]), but moderately when patients with retinopathy negative CM were also  
358 considered ( $r= -0.41$ ,  $p<0.001$ ; Fig 1E). Endothelial activation and WPB exocytosis are well  
359 established in CM including release of osteoprotegrin (OPG), which we have previously shown  
360 correlates with thrombocytopenia (40). Here circulating histone concentration correlated  
361 with plasma osteoprotegrin concentration ( $r = 0.54$ ,  $p<0.001$ , Fig 1F). These data show a  
362 specific association between histones and CM-pos but not with CM-neg or aparasitaemic  
363 encephalopathy and suggest a link between extracellular histones and critical factors involved  
364 in clot formation and localization.

365  
366 *Association between histone levels, brain swelling and fatal outcome.*

367 Given this association between histones and coagulopathy, a process implicated in brain  
368 swelling (41) and death (8, 42) in CM, we assessed the correlation between histone levels and  
369 fatal outcome and brain swelling. In children with CM-pos, the serum histone concentration  
370 was significantly higher in patients who died ( $n = 24$ ; geometric mean  $35.7$   $\mu\text{g/ml}$  [ $18.6$ – $68.6$   
371  $\mu\text{g/ml}$ ]; Fig 2A) than in patients who survived ( $n = 146$ ; geometric mean  $21.6$   $\mu\text{g/ml}$  [ $16.4$ –  
372  $28.6$   $\mu\text{g/ml}$ ];  $p = 0.04$ ).

373

374 In CM-pos cases histone levels were 3 times higher in children who had moderate brain  
375 swelling (geometric mean 26.9  $\mu\text{g/ml}$ ; 95% CI 17.45 – 41.42,  $p= 0.031$  ) or severe brain  
376 swelling (29.86  $\mu\text{g/ml}$ ; 95% CI 18.58 – 47.97,  $p = 0.024$ ) than in children who had no evidence  
377 of brain swelling on MRI (8.79  $\mu\text{g/ml}$ ; 95% CI 3.09 – 25.01) (Fig 2B). In comparison peripheral  
378 parasite density, PfHRP2, lactate, platelet levels, and osteoprotegrin levels were not  
379 significantly associated with brain swelling (Fig.S1). There was a significant association  
380 between platelet levels and swelling and lactate levels and swelling when a less stringent  
381 definition of CM was used (i.e. when both CM-pos and CM-neg cases were included, Figure  
382 S2), this wider inclusion also increased the strength of association for histones (Figure S2).  
383 Taken together these data indicate a strong association between histone levels and the  
384 degree of brain swelling over and above other laboratory factors associated with severity in  
385 CM.

386

387 *Detection of significant levels of P. falciparum histones in patient samples using mass*  
388 *spectrometry*

389 Owing to the highly conserved nature of histones, with >90% sequence homology between  
390 *Plasmodium* and human histones, available antibodies react with both human and  
391 *Plasmodium* histones (28). We developed a semi-quantitative mass spectrometry method  
392 (outlined in Figure 3A), to determine the proportion of parasitic and human histones within  
393 patient samples. Using *P. falciparum* histones purified from culture (Fig. S3), and pure human  
394 histones, we identified specific peptides for both H4 (Fig. 3B, C, Fig. S4) and H2A.Z (Fig. S4)  
395 that distinguished between *P. falciparum* and human histones (Fig. 3D, E). We then applied  
396 this method to serum samples from 10 children with CM-pos. *P. falciparum* and human  
397 histones were identified in all 10 CM cases, with *P. falciparum* histones constituting a mean  
398 of 51% (range 2% to 91%, Fig. 3F, G) of the total histone concentration.

399

400 *Accumulation of histones at the endothelial surface in the brain in fatal cases is associated*  
401 *with sequestration and with blood brain barrier breakdown*

402 Histone mediated barrier disruption is caused by histones binding to the endothelium,  
403 observed by histology in histone-infused mice (22). To explore whether extracellular histones  
404 bind to the endothelium in CM we performed immunostaining for histones in post-mortem  
405 brain samples from Malawian children (details of cases in Table S1). Compared with “faux  
406 CM” (CM3) cases ( $n=6$ , Fig 4A) or non-CM cases ( $n=5$ ) luminal histone staining was more  
407 frequent and stronger in CM cases (CM1/2,  $n=15$ , Fig 4B). Quantifying this by scoring with  
408 observers blinded to diagnosis, strong membrane staining was markedly associated with  
409 definitive CM when compared with faux CM (odds ratio [OR] 2.6; 95% Confidence Interval [CI]  
410 1.7 – 3.9;  $p<0.001$ ) or non-CM (OR 7.2; 95% CI 5.0 – 10.6;  $p<0.001$ ; Fig 4C).

411

412 Among definitive CM cases there was a strong association between histone membrane  
413 staining and the presence of IE. This increased with more intense IE-sequestration: when  
414 sequestration was present but in less than 50% of the vessel (+) the OR of histone membrane

415 staining being present was 5.2 (95% CI 2.8 – 9.7,  $p < 0.001$ ; Fig 4D); when greater than 50% of  
416 the vessel contained sequestered IE (++) the OR for the presence of histone staining was 16.9  
417 (95% CI 9.2 – 31.3;  $p < 0.001$ ).

418  
419 Histone staining was also strongly correlated with areas of BBB breakdown, demonstrated by  
420 staining for fibrinogen extravasation (Fig 4E): weak histone staining was associated with an  
421 OR of 2.8 for the presence of fibrinogen extravasation (95% CI 1.6 – 5.0;  $p < 0.001$ , 4F) and  
422 strong histone staining with an OR of 4.5 for fibrinogen extravasation (95% CI 1.8 – 11.4;  
423  $p = 0.001$ ), as shown in fig.4H as “% of vessels with leak”. Histone staining was also observed  
424 to co-localize with thrombi (Fig 4G) and with ring hemorrhages (Fig 4H).

425  
426 *Purified P. falciparum histones and serum from CM cases induce endothelial damage and*  
427 *barrier disruption*

428 Mammalian histones directly induce endothelial cell membrane damage and barrier  
429 disruption on human vein umbilical vein EC (16, 18) and *P. falciparum* histones induce damage  
430 in dermal and lung EC (28). To investigate the potential relevance of this in the brain, we  
431 tested whether purified *P. falciparum* histones cause cell damage and leak on primary human  
432 brain microvascular EC (HBMEC). *P. falciparum* histones induced significant cellular toxicity  
433 (Fig. 5A, B) similar to the effects seen with mammalian histones (16, 18). To demonstrate that  
434 this effect was specifically induced by histones, and not a contaminant, we used an anti-  
435 histone single-chain Fragment variable (ahscFv), previously shown to inhibit histone toxicity  
436 (18, 43). ahscFV abrogated histone-induced toxicity (Fig. 5A). Non-anti-coagulant heparin, a  
437 potential treatment with minimal toxicity that prevents toxicity of mammalian histones (24),  
438 also prevented *P. falciparum* histone toxicity on HBMEC (Fig. 5A).

439  
440 To investigate whether circulating histones from patients induce membrane toxicity, we  
441 incubated patient serum with HBMEC. Serum from CM-pos cases with elevated histones  
442 (histone concentration  $> 100 \mu\text{g/ml}$ ; Fig 5B;  $n = 3$ ) induced significant cellular toxicity, whereas  
443 serum from CM-pos cases without substantially elevated histones levels (histone  
444 concentration  $< 25 \mu\text{g/ml}$ ;  $n = 3$ ) did not, nor did samples from children with uncomplicated  
445 malaria ( $n = 3$ ), mild non-malarial febrile illness ( $n = 3$ ), non-malarial encephalopathy ( $n = 3$ ) or  
446 retinopathy negative CM ( $n = 3$ ; Figure 5B). Serum-induced toxicity was abrogated by ahscFv  
447 treatment, supporting a causal link with histones in the serum (Fig. 5A, B).

448  
449 We next investigated the effect of purified *P. falciparum* histones and patient serum on  
450 barrier integrity. Similar to human histones, *P. falciparum* histones induced rapid barrier  
451 disruption in HBMEC. This leak was reversed by ahscFv (Fig S5). Similarly, serum from CM-pos  
452 cases with high histone levels ( $n = 3$ ) induced leak, but serum from CM-neg cases and other  
453 control groups (all  $n = 3$ ) did not. Leak in the CM-pos cases was abrogated by ahscFV, also  
454 supporting that histones in the serum were causal in this leak (Fig. 5C).

455

456 Given the correlation between histones and thrombocytopenia in CM (Fig. 1E) we  
457 investigated whether *P. falciparum* histones also cause platelet aggregation. Incubation of  
458 purified *P. falciparum* histones with platelet rich plasma from normal healthy controls  
459 resulted in dose dependent platelet aggregation, inhibited with ahscFv treatment (Fig. 5D).

460

## 461 Discussion

462 A number of factors released from IE have been shown to cause endothelial damage or leak  
463 *in vitro* including glycosylphosphatidylinositol (44), extracellular vesicles (45), hemozoin and  
464 PfHRP2. IE-EC receptor-ligand interactions also cause endothelial perturbation (46-48). While  
465 it seems likely that CM pathogenesis constitutes a combination of interacting factors, rather  
466 than a single toxin or ligand (49, 50), we sought a factor that is necessary for CM vascular  
467 pathology and targetable with a safe and deployable treatment. Histones were a compelling  
468 candidate. Firstly because of the strong parallels between the clinicopathological features of  
469 histone-induced vascular pathology in other conditions and those in malaria. Secondly,  
470 because the sequestration of histone-packed IE in tissues would predict substantial  
471 concentration of histones being extruded to the endothelial surface. Thirdly because histones  
472 are a plausible target for an adjunctive therapy; treatments targeted against histones are  
473 protective in animal models of sepsis and trauma, even though extracellular histones are  
474 clearly not the sole factor contributing to pathogenesis in either of these conditions.

475

476 Our data provide evidence for histones as a mediator of the vascular pathology in the brain  
477 in CM that link causal data from *ex vivo* experiments (patient serum directly causes leak and  
478 toxicity, which is reversed by blocking histones) to multi-model observations in a rigorously  
479 defined patient cohort. Correlation between histones levels, diagnosis, fatal outcome,  
480 thrombocytopenia and fibrin production imply a role for histones in death and in key  
481 pathogenetic processes. Employing MRI scans and a grading system we established a  
482 correlation between serum histone levels and the level of brain swelling in children. We then  
483 showed that a significant proportion of histones were of parasite origin. Although human  
484 histones are also toxic, they are produced by diverse activated or damaged cells and might be  
485 a bystander event, triggered distant from sites of sequestration and vascular pathology. In  
486 contrast, parasite histones in the systemic circulation strongly suggest downstream detection  
487 of histones released from rupturing mature schizonts, in which histones are concentrated 16–  
488 24-fold, occurring almost exclusively in sequestered IE. Examination of histological staining in  
489 post-mortem CM brain samples supported this paradigm. Extracellular histones were bound  
490 to the EC membrane, more frequently in CM cases than controls and spatially associated with  
491 the presence of sequestered IE and with areas of fibrinogen leak and thrombosis.

492

493 To confirm whether plasmodial histones might be causal in these pathogenetic events, we  
494 purified *P. falciparum* histones from parasites grown in culture and showed that they induced  
495 membrane damage and leak in primary HBMEC and platelet aggregation in platelets from  
496 healthy donors. These effects were prevented by specific ahscFv. Patient serum from CM

497 cases with high levels of histones also induced EC membrane toxicity and leak. Both were  
498 blocked by pre-incubation with ahscFv, indicating that the effects were caused by active  
499 histones in serum. Heparins, including non-anticoagulant heparins have been shown to  
500 neutralize the effects of mammalian histones and may represent promising therapies. As a  
501 proof of concept, we showed that non-anticoagulant heparin prevented toxicity from *P.*  
502 *falciparum* histones. Taken together, these data show that *P. falciparum* histones are  
503 produced at significant levels *in vivo*, that they circulate in an active form, show a causal role  
504 for histones from patient serum samples *ex vivo* in processes leading to CM pathogenesis and  
505 provide multiple points of evidence supporting a role of histones in key disease processes in  
506 patients.

507

508 The locations of plasmodial histone production and what we know about modifiers of histone  
509 response fit well with the non-uniform pattern of vascular involvement in CM, whereby  
510 coagulopathy and leak are localized to sites of IE sequestration and in particular to the brain.  
511 It is notable that the median concentration of histones in the serum in CM-pos cases was  
512 24.6µg/ ml, and that toxicity to HBMEC in our assay was only seen at histones concentrations  
513 of >50µg/ ml (similar to mammalian histones and to experiments using purified exogenous  
514 histone infusion in mice (16, 22, 28)). The implication being that in most patients with CM,  
515 histone levels in the circulation do not reach levels sufficient to cause systemic toxicity. This  
516 is in keeping with the observed clinical pattern of disease in CM in African children: deep coma  
517 and marked cerebral irritability, generally without multi-organ failure (14) or systemic  
518 coagulopathy (11). In contrast it seems highly plausible that *P. falciparum* histones  
519 concentrate several-fold at sites of intense sequestration (Fig. 3B) and cross this toxic  
520 threshold. We hypothesize that the brain is particularly vulnerable to histone toxicity because  
521 of reduced capacity to produce aPC. This would not be expected to manifest in conditions  
522 involving release of histones from immune-activated cells such as in sepsis and trauma, given  
523 that the brain is an immune-privileged site (51). The paradigm in CM is different; parasite  
524 histones reach high levels in the brain through IE sequestration. Moreover, IE sequestration  
525 in the brain may itself impair aPC production - firstly because IE reduce surface  
526 thrombomodulin and EPCR, putatively by receptor cleavage (8, 15). Secondly, parasite  
527 variants associated with the development of CM (expressing domain cassette 8 [DC8]) reduce  
528 aPC production, by binding to EPCR and inhibiting its activity (52). DC8 variants also show a  
529 tropism for brain endothelium (34, 52, 53). Hence parasites in CM patients may be more likely  
530 to concentrate plasmodial histones in the brain, through sequestration, and simultaneously  
531 may prevent their breakdown, through inhibiting aPC production. In support of this, DC8  
532 expressing variants are associated with both thrombocytopenia and brain swelling (48); aPC  
533 inhibition potentially increasing both histone-induced platelet aggregation and histone-  
534 induced endothelial leak. It is notable that histones are implicated in neurotoxicity and  
535 ischemic damage in neurodegenerative conditions and stroke, and that in animal models  
536 these effects are reversed by aPC (54-56).

537

538 Our study has several limitations. Firstly, our study is in human patients. While generally a  
539 strength, this leads to marked heterogeneity, including in variables that might affect histone  
540 levels, such as length of illness and timing of antimalarial administration. Further we took  
541 blood from each patient at only one timepoint, representing a snapshot in a dynamic disease  
542 process. This precluded examination of the temporal association between histone levels and  
543 other variables. Secondly, while the association between histone binding and sequestration  
544 and the finding that 51% of histones in serum were of parasite origin are both highly  
545 suggestive of a parasite origin for luminal histones, we did not prove this. Nonetheless  
546 concentration of host histones at sites of IE sequestration would also be predicted to have  
547 similar effects and to respond to similar treatments.

548  
549 Given that a significant proportion of histones detected in blood are of parasite origin it is  
550 notable that histone levels do not correlate well with parasitemia or PfHRP2. This may reflect  
551 the limitations of each of these assays, used at a single time point, to determine total parasite  
552 biomass. Firstly, our main assay to determine histone levels does not distinguish human from  
553 parasite histones. Serum histone levels are likely to be a function of production, breakdown  
554 and luminal binding and hence it is unclear how accurately serum histone levels of either  
555 species correlate with total production. Secondly peripheral parasitemia is a poor predictor  
556 of total parasite biomass: sequestered IE do not circulate, and so the concentration of  
557 parasites detectable in the periphery fluctuates markedly depending on the stage of the  
558 majority of the parasites in an individual patient. Thirdly, PfHRP2, a soluble parasite factor,  
559 has a long half-life and therefore its concentration in serum is a function of parasite biomass  
560 and duration of infection. While PfHRP2 is a predictor of parasite biomass and correlates with  
561 disease severity in several populations (57, 58), among Malawian children with CM, serum  
562 PfHRP2 levels do not correlate well with markers of severity (such as lactate or  
563 thrombocytopenia) or with outcome (59).

564  
565 Further work is warranted to explore the biology and timing of plasmodial histone release  
566 and the mechanism of action of plasmodial histones in greater detail. A specific antibody  
567 against *P. falciparum* histone would be useful to differentiate *P. falciparum* histone levels in  
568 serum and in tissue. It remains to be determined whether agents that neutralize or degrade  
569 histones can reduce brain swelling during the critical 24 hours after hospital admission and  
570 thereby improve outcome in CM. Potential agents include aPC or heparin (24, 60, 61).  
571 Modified non-anticoagulant heparins are a rational first choice, particularly given their use in  
572 critically ill patients with a variety of inflammatory diseases (61) and in patients with sickle  
573 cell crisis (62). There is a planned phase II study in patients to use a modified heparin to  
574 reverse binding and rosetting in malaria. A different dosing regimen is likely to be needed to  
575 reverse the effects of histones than to block binding, which would require further  
576 investigation. However, the possibility that modified heparins could be synergistic in malaria  
577 – both reducing binding and neutralizing heparins – make the potential benefits more

578 compelling. Finally, since cells in all eukaryotic organisms contain histones it will be important  
579 to explore whether parasite histones contribute to pathogenesis in other parasitic infections.

580

581

## 582 **Supplementary Materials**

583 Fig. S1. Histones but not other laboratory factors are associated with the degree of brain  
584 swelling in CM-pos patients.

585 Fig. S2. When both CM-pos and CM-neg cases are included, histones platelet count and  
586 lactate are associated with the degree of brain swelling.

587 Fig. S3. Gel showing purified *Plasmodium falciparum* (P. f.) and human histones.

588 Fig. S4. Alignment of Homo sapiens and *P. falciparum* histones

589 Fig. S5. Time-course of barrier disruption of Primary human brain microvascular endothelial  
590 cells (HBMEC) by *P. falciparum* histones in a dual chamber system

591

592 Table S1. Summary of post-mortem cases

593

## 594 **References**

- 595 1. Taylor TE, Fu WJ, Carr RA, Whitten RO, Mueller JS, Fosiko NG, et al. Differentiating  
596 the pathologies of cerebral malaria by postmortem parasite counts. Nat Med.  
597 2004;10(2):143-5.
- 598 2. WHO. World Malaria Report 2017. Geneva: World Health Organization; 2017 2017.
- 599 3. Seydel KB, Kampondeni SD, Valim C, Potchen MJ, Milner DA, Muwalo FW, et al. Brain  
600 swelling and death in children with cerebral malaria. The New England journal of medicine.  
601 2015;372(12):1126-37.
- 602 4. Mohanty S, Benjamin LA, Majhi M, Panda P, Kampondeni S, Sahu PK, et al. Magnetic  
603 Resonance Imaging of Cerebral Malaria Patients Reveals Distinct Pathogenetic Processes in  
604 Different Parts of the Brain. mSphere. 2017;2(3).
- 605 5. Dondorp AM, Fanello CI, Hendriksen IC, Gomes E, Seni A, Chhaganlal KD, et al.  
606 Artesunate versus quinine in the treatment of severe falciparum malaria in African children  
607 (AQUAMAT): an open-label, randomised trial. Lancet. 2010;376(9753):1647-57.
- 608 6. Barrera V, MacCormick IJC, Czanner G, Hiscott PS, White VA, Craig AG, et al.  
609 Neurovascular sequestration in paediatric *P. falciparum* malaria is visible clinically in the  
610 retina. Elife. 2018;7.
- 611 7. Zhao Y, MacCormick IJ, Parry DG, Leach S, Beare NA, Harding SP, et al. Automated  
612 detection of leakage in fluorescein angiography images with application to malarial  
613 retinopathy. Sci Rep. 2015;5:10425.
- 614 8. Moxon CA, Wassmer SC, Milner DA, Jr., Chisala NV, Taylor TE, Seydel KB, et al. Loss  
615 of endothelial protein C receptors links coagulation and inflammation to parasite  
616 sequestration in cerebral malaria in African children. Blood. 2013;122(5):842-51.
- 617 9. Dorovini-Zis K, Schmidt K, Huynh H, Fu W, Whitten RO, Milner D, et al. The  
618 neuropathology of fatal cerebral malaria in malawian children. Am J Pathol.  
619 2011;178(5):2146-58.
- 620 10. Francischetti IM, Seydel KB, Monteiro RQ, Whitten RO, Erexson CR, Noronha AL, et  
621 al. Plasmodium falciparum-infected erythrocytes induce tissue factor expression in  
622 endothelial cells and support the assembly of multimolecular coagulation complexes. J  
623 Thromb Haemost. 2007;5(1):155-65.

- 624 11. Moxon CA, Chisala NV, Mzikamanda R, MacCormick I, Harding S, Downey C, et al.  
625 Laboratory evidence of disseminated intravascular coagulation is associated with a fatal  
626 outcome in children with cerebral malaria despite an absence of clinically evident  
627 thrombosis or bleeding. *J Thromb Haemost.* 2015;13(9):1653-64.
- 628 12. Greiner J, Dorovini-Zis K, Taylor TE, Molyneux ME, Beare NA, Kamiza S, et al.  
629 Correlation of hemorrhage, axonal damage, and blood-tissue barrier disruption in brain and  
630 retina of Malawian children with fatal cerebral malaria. *Front Cell Infect Microbiol.*  
631 2015;5:18.
- 632 13. Haldar K, Murphy SC, Milner DA, Taylor TE. Malaria: mechanisms of erythrocytic  
633 infection and pathological correlates of severe disease. *Annu Rev Pathol.* 2007;2:217-49.
- 634 14. Milner DA, Jr., Whitten RO, Kamiza S, Carr R, Liomba G, Dzamalala C, et al. The  
635 systemic pathology of cerebral malaria in African children. *Front Cell Infect Microbiol.*  
636 2014;4:104.
- 637 15. Aird WC, Mosnier LO, Fairhurst RM. Plasmodium falciparum picks (on) EPCR. *Blood.*  
638 2013.
- 639 16. Xu J, Zhang X, Pelayo R, Monestier M, Ammollo CT, Semeraro F, et al. Extracellular  
640 histones are major mediators of death in sepsis. *Nature medicine.* 2009;15(11):1318-21.
- 641 17. Szatmary P, Huang W, Criddle D, Tepikin A, Sutton R. Biology, role and therapeutic  
642 potential of circulating histones in acute inflammatory disorders. *J Cell Mol Med.*  
643 2018;22(10):4617-29.
- 644 18. Abrams ST, Zhang N, Manson J, Liu T, Dart C, Baluwa F, et al. Circulating histones are  
645 mediators of trauma-associated lung injury. *Am J Respir Crit Care Med.* 2013;187(2):160-9.
- 646 19. Alhamdi Y, Abrams ST, Lane S, Wang G, Toh CH. Histone-Associated  
647 Thrombocytopenia in Patients Who Are Critically Ill. *JAMA.* 2016;315(8):817-9.
- 648 20. Alhamdi Y, Abrams ST, Cheng Z, Jing S, Su D, Liu Z, et al. Circulating Histones Are  
649 Major Mediators of Cardiac Injury in Patients With Sepsis. *Crit Care Med.* 2015;43(10):2094-  
650 103.
- 651 21. Abrams ST, Zhang N, Dart C, Wang SS, Thachil J, Guan Y, et al. Human CRP defends  
652 against the toxicity of circulating histones. *J Immunol.* 2013;191(5):2495-502.
- 653 22. Abrams ST, Zhang N, Manson J, Liu T, Dart C, Baluwa F, et al. Circulating histones are  
654 mediators of trauma-associated lung injury. *American journal of respiratory and critical care*  
655 *medicine.* 2013;187(2):160-9.
- 656 23. Alhamdi Y, Zi M, Abrams ST, Liu T, Su D, Welters I, et al. Circulating Histone  
657 Concentrations Differentially Affect the Predominance of Left or Right Ventricular  
658 Dysfunction in Critical Illness. *Crit Care Med.* 2015.
- 659 24. Wildhagen KC, Garcia de Frutos P, Reutelingsperger CP, Schrijver R, Areste C, Ortega-  
660 Gomez A, et al. Nonanticoagulant heparin prevents histone-mediated cytotoxicity in vitro  
661 and improves survival in sepsis. *Blood.* 2014;123(7):1098-101.
- 662 25. Michels A, Albanez S, Mewburn J, Nesbitt K, Gould TJ, Liaw PC, et al. Histones link  
663 inflammation and thrombosis through the induction of Weibel-Palade body exocytosis. *J*  
664 *Thromb Haemost.* 2016;14(11):2274-86.
- 665 26. Yang X, Li L, Liu J, Lv B, Chen F. Extracellular histones induce tissue factor expression  
666 in vascular endothelial cells via TLR and activation of NF-kappaB and AP-1. *Thromb Res.*  
667 2016;137:211-8.
- 668 27. Kim JE, Yoo HJ, Gu JY, Kim HK. Histones Induce the Procoagulant Phenotype of  
669 Endothelial Cells through Tissue Factor Up-Regulation and Thrombomodulin Down-  
670 Regulation. *PLoS One.* 2016;11(6):e0156763.



- 671 28. Gillrie MR, Lee K, Gowda DC, Davis SP, Monestier M, Cui L, et al. Plasmodium  
672 falciparum histones induce endothelial proinflammatory response and barrier dysfunction.  
673 *The American journal of pathology*. 2012;180(3):1028-39.
- 674 29. Seydel KB, Milner DA, Jr., Kamiza SB, Molyneux ME, Taylor TE. The distribution and  
675 intensity of parasite sequestration in comatose Malawian children. *J Infect Dis*.  
676 2006;194(2):208-5.
- 677 30. Turner GD, Morrison H, Jones M, Davis TM, Looareesuwan S, Buley ID, et al. An  
678 immunohistochemical study of the pathology of fatal malaria. Evidence for widespread  
679 endothelial activation and a potential role for intercellular adhesion molecule-1 in cerebral  
680 sequestration. *Am J Pathol*. 1994;145(5):1057-69.
- 681 31. Macko RF, Killewich LA, Fernandez JA, Cox DK, Gruber A, Griffin JH. Brain-specific  
682 protein C activation during carotid artery occlusion in humans. *Stroke; a journal of cerebral*  
683 *circulation*. 1999;30(3):542-5.
- 684 32. Ishii H, Salem HH, Bell CE, Laposata EA, Majerus PW. Thrombomodulin, an  
685 endothelial anticoagulant protein, is absent from the human brain. *Blood*. 1986;67(2):362-5.
- 686 33. Laszik Z, Mitro A, Taylor FB, Jr., Ferrell G, Esmon CT. Human protein C receptor is  
687 present primarily on endothelium of large blood vessels: implications for the control of the  
688 protein C pathway. *Circulation*. 1997;96(10):3633-40.
- 689 34. Claessens A, Adams Y, Ghumra A, Lindergard G, Buchan CC, Andisi C, et al. A subset  
690 of group A-like var genes encodes the malaria parasite ligands for binding to human brain  
691 endothelial cells. *Proc Natl Acad Sci U S A*. 2012;109(26):E1772-81.
- 692 35. Turner L, Lavstsen T, Berger SS, Wang CW, Petersen JE, Avril M, et al. Severe malaria  
693 is associated with parasite binding to endothelial protein C receptor. *Nature*.  
694 2013;498(7455):502-5.
- 695 36. Petersen JE, Bouwens EA, Tamayo I, Turner L, Wang CW, Stins M, et al. Protein C  
696 system defects inflicted by the malaria parasite protein PfEMP1 can be overcome by a  
697 soluble EPCR variant. *Thromb Haemost*. 2015;114(5):1038-48.
- 698 37. Barrera V, Hiscott PS, Craig AG, White VA, Milner DA, Beare NA, et al. Severity of  
699 Retinopathy Parallels the Degree of Parasite Sequestration in the Eyes and Brains of  
700 Malawian Children With Fatal Cerebral Malaria. *The Journal of infectious diseases*. 2014.
- 701 38. Small DS, Taylor TE, Postels DG, Beare NA, Cheng J, MacCormick IJ, et al. Evidence  
702 from a natural experiment that malaria parasitemia is pathogenic in retinopathy-negative  
703 cerebral malaria. *Elife*. 2017;6.
- 704 39. Liaw PC, Fredenburgh JC, Stafford AR, Tulinsky A, Austin RC, Weitz JI. Localization of  
705 the thrombin-binding domain on prothrombin fragment 2. *The Journal of biological*  
706 *chemistry*. 1998;273(15):8932-9.
- 707 40. O'Regan N, Moxon C, Gegenbauer K, O'Sullivan JM, Chion A, Smith OP, et al. Marked  
708 elevation in plasma osteoprotegerin constitutes an early and consistent feature of cerebral  
709 malaria. *Thromb Haemost*. 2016;115(4):773-80.
- 710 41. Potchen MJ, Kampondeni SD, Seydel KB, Haacke EM, Sinyangwe SS, Mwenechanya  
711 M, et al. 1.5 Tesla Magnetic Resonance Imaging to Investigate Potential Etiologies of Brain  
712 Swelling in Pediatric Cerebral Malaria. *Am J Trop Med Hyg*. 2018;98(2):497-504.
- 713 42. Moxon CA, Zhao L, Li C, Seydel KB, MacCormick IJ, Diggle PJ, et al. Safety of lumbar  
714 puncture in comatose children with clinical features of cerebral malaria. *Neurology*.  
715 2016;87(22):2355-62.

- 716 43. Dou Y, Mizzen CA, Abrams M, Allis CD, Gorovsky MA. Phosphorylation of linker  
717 histone H1 regulates gene expression in vivo by mimicking H1 removal. *Mol Cell*.  
718 1999;4(4):641-7.
- 719 44. Schofield L, Vivas L, Hackett F, Gerold P, Schwarz RT, Tachado S. Neutralizing  
720 monoclonal antibodies to glycosylphosphatidylinositol, the dominant TNF-alpha-inducing  
721 toxin of *Plasmodium falciparum*: prospects for the immunotherapy of severe malaria. *Ann*  
722 *Trop Med Parasitol*. 1993;87(6):617-26.
- 723 45. Mantel PY, Hoang AN, Goldowitz I, Potashnikova D, Hamza B, Vorobjev I, et al.  
724 Malaria-infected erythrocyte-derived microvesicles mediate cellular communication within  
725 the parasite population and with the host immune system. *Cell Host Microbe*.  
726 2013;13(5):521-34.
- 727 46. Chakravorty SJ, Hughes KR, Craig AG. Host response to cytoadherence in  
728 *Plasmodium falciparum*. *Biochem Soc Trans*. 2008;36(Pt 2):221-8.
- 729 47. Tripathi AK, Sullivan DJ, Stins MF. *Plasmodium falciparum*-infected erythrocytes  
730 increase intercellular adhesion molecule 1 expression on brain endothelium through NF-  
731 kappaB. *Infection and immunity*. 2006;74(6):3262-70.
- 732 48. Kessler A, Dankwa S, Bernabeu M, Harawa V, Danziger SA, Duffy F, et al. Linking  
733 EPCR-Binding PfEMP1 to Brain Swelling in Pediatric Cerebral Malaria. *Cell Host Microbe*.  
734 2017;22(5):601-14 e5.
- 735 49. Cunnington AJ, Walther M, Riley EM. Piecing together the puzzle of severe malaria.  
736 *Sci Transl Med*. 2013;5(211):211ps18.
- 737 50. Miller LH, Ackerman HC, Su XZ, Wellems TE. Malaria biology and disease  
738 pathogenesis: insights for new treatments. *Nature medicine*. 2013;19(2):156-67.
- 739 51. Spadoni I, Fornasa G, Rescigno M. Organ-specific protection mediated by  
740 cooperation between vascular and epithelial barriers. *Nat Rev Immunol*. 2017;17(12):761-  
741 73.
- 742 52. Turner L, Lavstsen T, Berger SS, Wang CW, Petersen JE, Avril M, et al. Severe malaria  
743 is associated with parasite binding to endothelial protein C receptor. *Nature*. 2013.
- 744 53. Storm J, Jespersen JS, Seydel KB, Szeszak T, Mbewe M, Chisala NV, et al. Cerebral  
745 malaria is associated with differential cytoadherence to brain endothelial cells. *EMBO Mol*  
746 *Med*. 2019;11(2).
- 747 54. Cheng T, Liu D, Griffin JH, Fernandez JA, Castellino F, Rosen ED, et al. Activated  
748 protein C blocks p53-mediated apoptosis in ischemic human brain endothelium and is  
749 neuroprotective. *Nature medicine*. 2003;9(3):338-42.
- 750 55. Griffin JH, Zlokovic BV, Mosnier LO. Activated protein C, protease activated receptor  
751 1, and neuroprotection. *Blood*. 2018;132(2):159-69.
- 752 56. Gilthorpe JD, Oozer F, Nash J, Calvo M, Bennett DL, Lumsden A, et al. Extracellular  
753 histone H1 is neurotoxic and drives a pro-inflammatory response in microglia. *F1000Res*.  
754 2013;2:148.
- 755 57. Dondorp AM, Desakorn V, Pongtavornpinyo W, Sahassananda D, Silamut K,  
756 Chotivanich K, et al. Estimation of the total parasite biomass in acute *falciparum* malaria  
757 from plasma PfHRP2. *PLoS medicine*. 2005;2(8):e204.
- 758 58. Hendriksen IC, Mwanga-Amumpaire J, von Seidlein L, Mtove G, White LJ,  
759 Olaosebikan R, et al. Diagnosing severe *falciparum* malaria in parasitaemic African children:  
760 a prospective evaluation of plasma PfHRP2 measurement. *PLoS medicine*.  
761 2012;9(8):e1001297.

- 762 59. Thakur KT, Vareta J, Carson KA, Kampondeni S, Potchen MJ, Birbeck GL, et al.  
763 Cerebrospinal fluid Plasmodium falciparum histidine-rich protein-2 in pediatric cerebral  
764 malaria. *Malar J.* 2018;17(1):125.  
765 60. Griffin JH, Zlokovic BV, Mosnier LO. Activated protein C: biased for translation.  
766 *Blood.* 2015;125(19):2898-907.  
767 61. Cassinelli G, Naggi A. Old and new applications of non-anticoagulant heparin. *Int J*  
768 *Cardiol.* 2016;212 Suppl 1:S14-21.  
769 62. Telen MJ, Batchvarova M, Shan S, Bovee-Geurts PH, Zennadi R, Leitgeb A, et al.  
770 Sevuparin binds to multiple adhesive ligands and reduces sickle red blood cell-induced vaso-  
771 occlusion. *Br J Haematol.* 2016;175(5):935-48.

772

773 **Acknowledgments:** For recruiting and caring for patients, we would like to thank the nurses  
774 and clinicians on the Paediatric Research Ward team (Malawi–Liverpool–Wellcome Clinical  
775 Research Programme and Blantyre Malaria Project), and the nurses and clinicians in the  
776 Department of Paediatrics and Child Health (Queen Elizabeth Hospital, Blantyre, Malawi).  
777 For performing the fibrin-based assays, we would like to thank C. Powell (Roald Dahl  
778 Haemostasis & Thrombosis Centre, Liverpool, U.K.). For histopathology advice we would like  
779 to thank Dan Milner. For technical support with histopathology we would like to thank Qian  
780 Zhen (Program in Dermatopathology, Department of Pathology, Brigham and Women's  
781 Hospital, Boston, U.S.A.). For providing laboratory space and advice we would like to thank  
782 Dyann Wirth. For helpful comments on the manuscript we would like to thank Andy Waters  
783 and Matthias Marti (Wellcome Centre for Integrative Parasitology, University of Glasgow).

784 **Funding:** This work was supported by funding from the Wellcome Trust (to C.A.M;  
785 109698/Z/15/Z) and Academy of Medical Sciences (to C.A.M.); and a grant from the NIH (T.  
786 E. Taylor, 5R01AI034969-14). The Malawi–Liverpool Wellcome Clinical Research Programme  
787 is supported by core funding from The Wellcome Trust (084679/Z/08/Z).

788 **Author contributions:** C.A.M., S.T.A., A.G.C., W.G. and C.H.T., conceived the study and  
789 designed experiments. C.A.M. and S.A. performed analysis. Y.A., S.A., J-Y. K., J.S., J.M.T., N.O.  
790 and C.A.M. performed laboratory experiments. K.B.S. and T.E.T. ran the clinical study and  
791 provided clinical and scientific input. M.E.M. provided clinical and scientific input. G.M.,  
792 G.G.C. and J.O. designed experiments and provided scientific and technical input. C.A.M.  
793 wrote the original draft with significant input from A.G.C, S.A. and C.H.T. All authors  
794 contributed to critical review and editing of the manuscript.

795 **Competing interests:** The authors have no conflicting interests.

796

797

798

799

800

801

802

803

804

805

806

807 **Figures**  
808

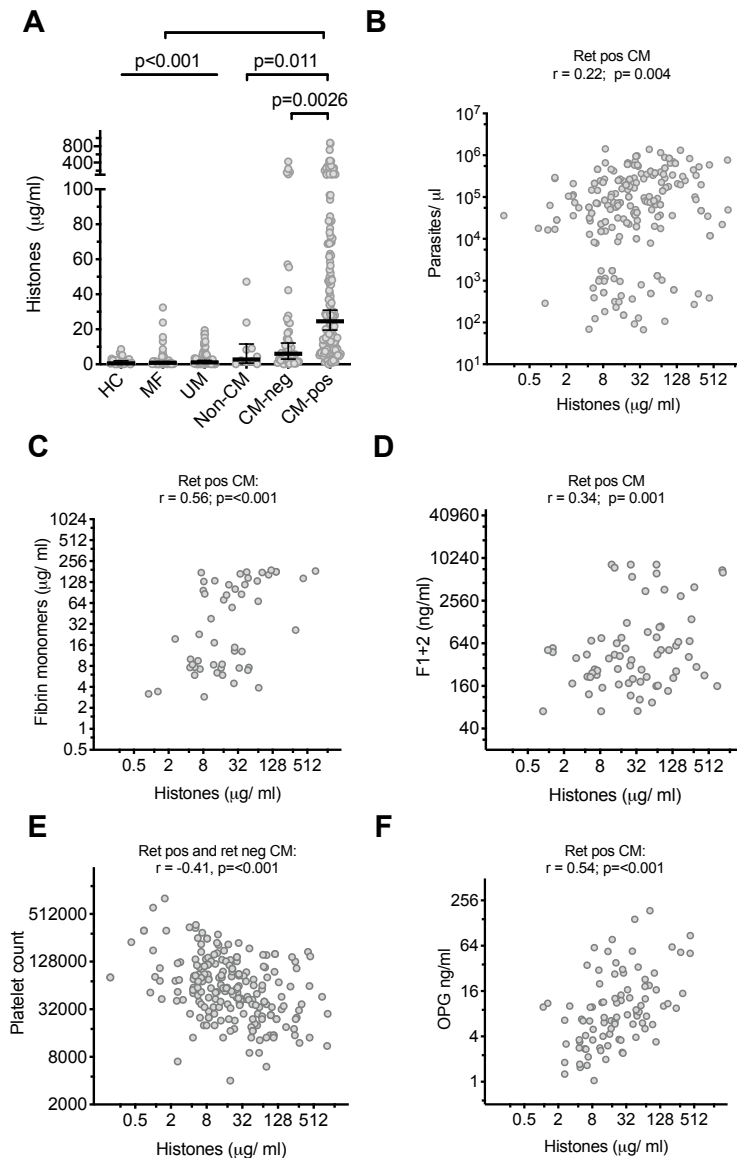

809  
810  
811  
812  
813  
814  
815  
816  
817  
818  
819  
820  
821  
822  
823  
824

**Fig 1. Circulating extracellular histones are elevated in cerebral malaria and correlate with intravascular fibrin generation and with endothelial activation.** Extracellular histone levels were measured in serum samples taken on admission. (A) The mean concentration of extracellular histone levels in circulation was significantly higher in retinopathy positive cerebral malaria cases (CM-pos) than in all other patient groups including retinopathy negative CM (CM-neg). (B-F) correlations between serum extracellular histone concentration: peripheral parasite density in children with CM-pos (B); plasma fibrin monomer levels in children with CM-pos (C); prothrombin fragment F1+2 in children with CM-pos (D); platelet count among all children with CM (CM-pos and CM-neg) (E); plasma osteoprotegerin (OPG) concentration in children with CM-pos (F).  
HC = Healthy control; MF = Mild Febrile illness; UM = uncomplicated malaria; Non-CM (aparasitaemic children with encephalopathy [in coma] due to a cause other than malaria).

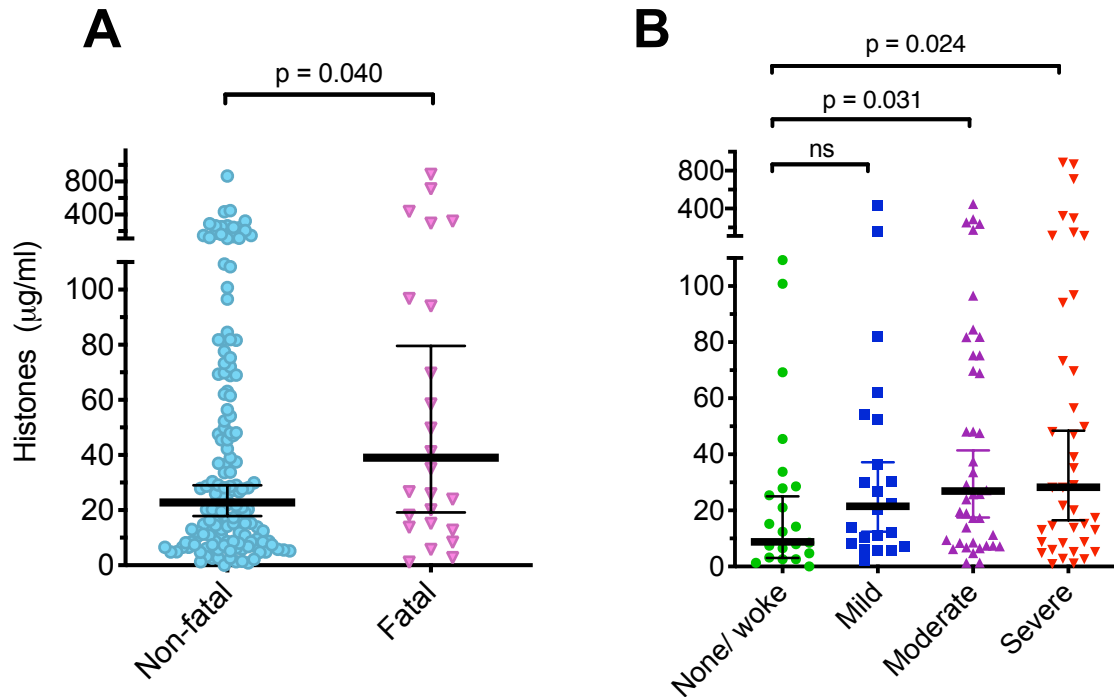

825  
826  
827  
828  
829  
830  
831  
832  
833  
834  
835  
836  
837

**Fig 2. Extracellular histones are associated with fatal outcome and with the degree of brain swelling demonstrated on MRI scan.**

(A) In CM-pos cases ( $n=170$ ), the mean extracellular histone level was higher in children who went on to die (fatal;  $n=24$ ) than in those who survived (non-fatal;  $n=146$ ). (B) Children were categorised by the degree of brain swelling on MRI; circulating histones were higher in children with moderate ( $n=41$ ) or severe brain swelling ( $n=47$ ) than in those with no evidence of brain swelling ( $n=22$ ).

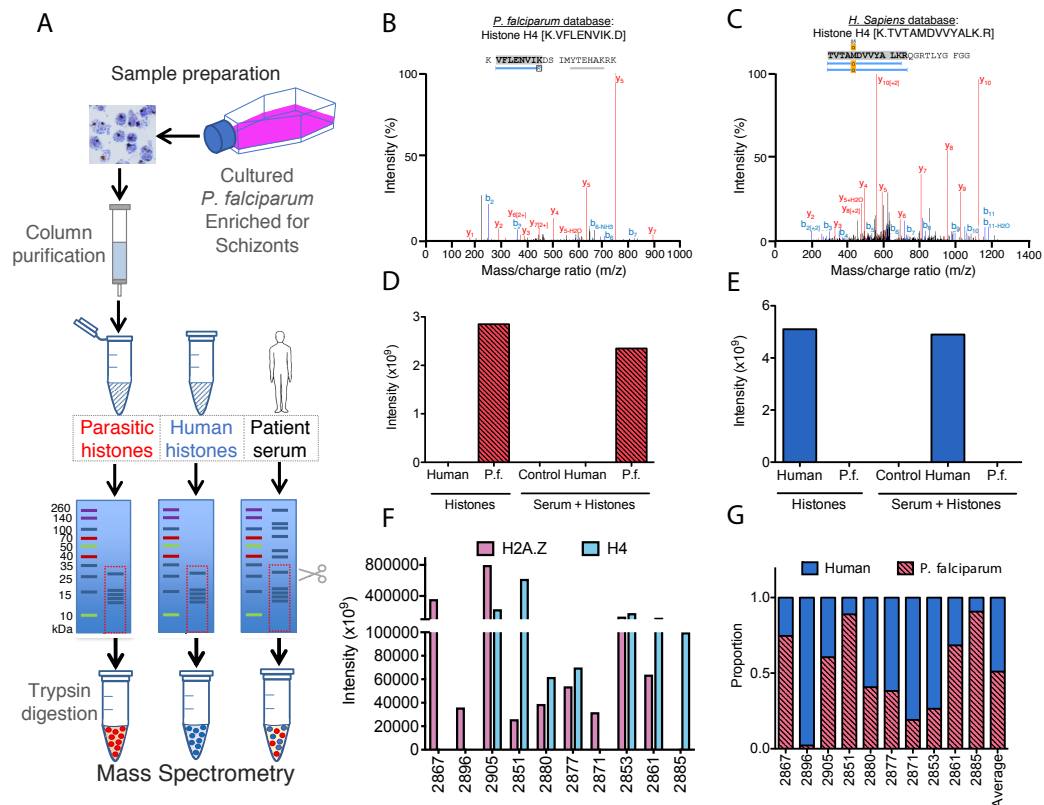

838  
839

840 **Figure 3. Mass spectrometry analysis of origin of extracellular histones in cerebral malaria**  
 841 **cases.** (A) Schematic representation of the methodology used for isolation, purification and  
 842 mass spectrometry analysis. (B,C) Using Skyline software and by aligning trypsin fragments to  
 843 reference amino acid sequences we were able to identify specific histone H2A.Z and H4  
 844 peptides that were present in purified *P. falciparum* (malarial) preparations, that were not  
 845 present in purified human histones (H1, H2A, H2B, H3 and H4) and vice versa. Typical peptides  
 846 are presented from human (B) and malarial (C) database searches. Using Skyline software, we  
 847 were able to identify histone H4 peptides for each species that demonstrated different Mass/  
 848 Charge ratios with distinct human and *P. falciparum* peptides and also distinct H2A.Z human  
 849 and *P. falciparum* peptides (data not shown). (D,E) This enabled us to identify with high  
 850 specificity and *P. falciparum* (D) and Human (E) species-specific peptides derived from  
 851 samples spiked into PBS (left) or serum (right); data shown are for H4. (F) In CM-pos patient  
 852 serum (n=10) we were able to *P. falciparum* histones H2A.Z and H4 in the samples as well as  
 853 human H2A.Z and H4 (data not shown). (G) We combined the contribution of these two  
 854 components to estimate the variable proportions of circulating human and *P. falciparum*  
 855 in the patient serum, demonstrating a significant contribution of *P. falciparum* histones to the  
 856 total pool.

857  
858

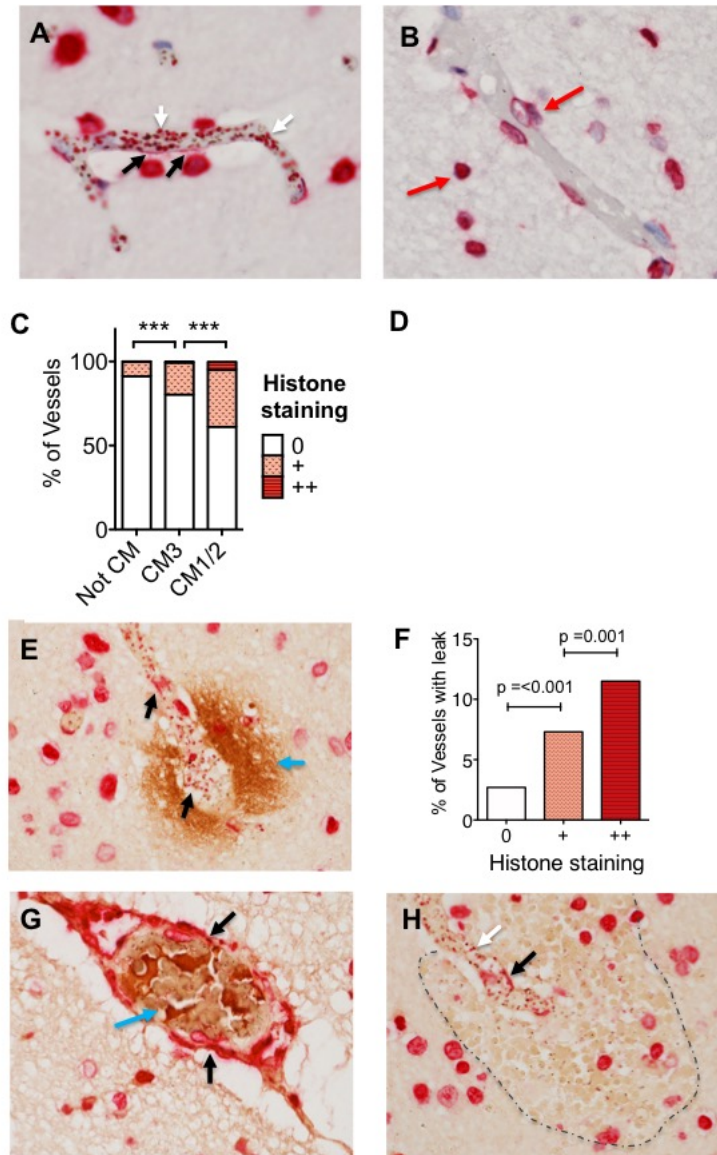

859  
860

861 **Figure 4. Histones accumulate at the endothelial surface in the cerebral microvasculature,**  
 862 **associated with sequestration, coagulopathy and blood brain barrier breakdown.** (A)  
 863 Cerebral malaria case showing histone staining in close proximity with endothelial cell luminal  
 864 surface (black arrows) and in both mammalian nuclei and malaria infected red blood cell (IE)  
 865 nuclei (white arrow); (B) Non-CM case with no histone endothelial membrane binding,  
 866 histone staining can be seen in mammalian cell nuclei (red arrows); (C) Extracellular histone  
 867 staining is markedly increased in CM1/2 “true cerebral malaria” (n=15) compared to ‘faux CM’  
 868 cases (peripheral parasitaemia, no sequestration in the brain and another cause of death at  
 869 autopsy, CM3; n=6) or aparasitaemic non-CM cases (n=5) ; (D) In CM cases (CM1/CM2; n=15)  
 870 there is a strong association between the degree of sequestration and the presence and  
 871 strength of histone membrane staining. (E) Histone endothelial membrane staining (black  
 872 arrows) co-localizing with fibrinogen extravasation (blue arrow), which is indicative of blood  
 873 brain barrier breakdown. (F) Strong association between the extent of histone endothelial  
 874 membrane staining and the presence of fibrinogen extravasation. (G) Histone membrane  
 875 staining (black arrows) co-localizing with thrombosis (blue arrow). (H) Histone membrane  
 876 staining (black arrow) co-localizing with a ring haemorrhage (edge demarcated by dotted  
 877 line).

878

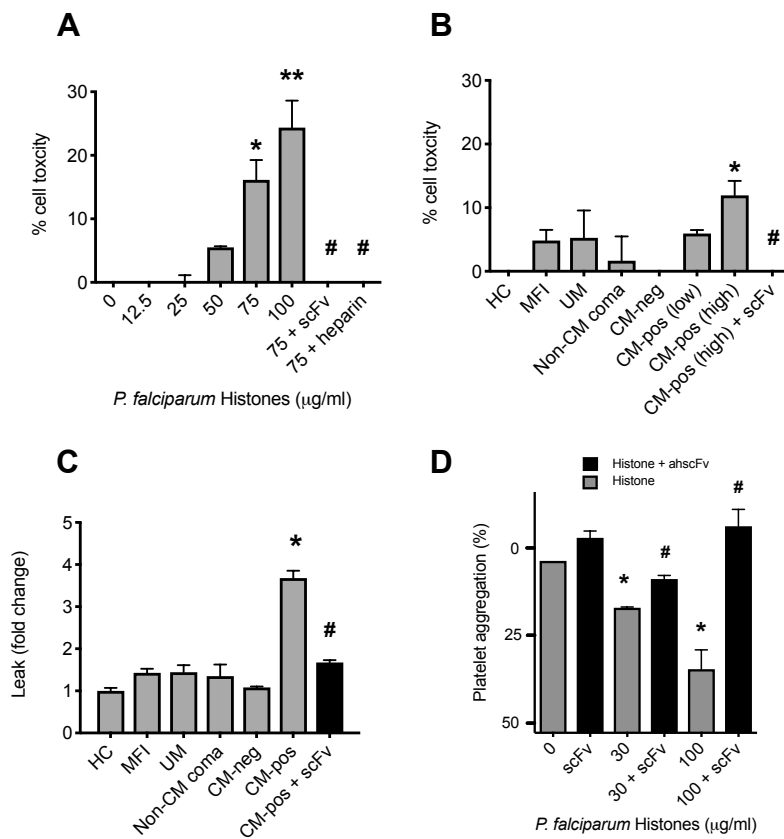

879

880

881 **Figure 5. *P. falciparum* histones induce endothelial cell damage, permeability and platelet**

882 **aggregation.** A) HBMECs were treated for 1 hour with medium with or without purified *P.*

883 *falciparum* histones (conc) ± anti-histone single-chain Fragment variable (scFv) or non-

884 anticoagulant heparin. Cell toxicity was determined by propidium iodide staining using flow

885 cytometry. Data are expressed relative to cells treated with media alone (set to 0%). ANOVA

886 test \* =  $p < 0.05$  when compared with untreated, # =  $p < 0.05$  when compared with CM-pos

887 high treated with histone alone; B) HBMECs were treated for 1 hour with serum from

888 retinopathy positive CM (± anti-histone scFv), uncomplicated malaria, mild non-malarial

889 febrile illness, non-malarial encephalopathy or retinopathy negative malaria and healthy

890 controls. Cell toxicity (means ± SD) relative to HBMEC treated with serum from healthy control

891 cases (set to 0%) are presented. C) Transwell permeability changes of HBMEC monolayer are

892 expressed as fold changes in HRP pass through compared to cells treated with normal healthy

893 serum. \*ANOVA test shows a significant decrease compared with normal ( $P < 0.05$ ), # $p < 0.05$

894 when compared with retinopathy positive CM alone D) Platelet rich plasma was incubated

895 with different concentrations of *P. falciparum* histones ± anti-histone scFv. Platelet

896 aggregation (%) (means ± SD;) are presented following 15 mins incubation. ANOVA test, \* $p <$

897  $0.05$  when compared with untreated, # $p < 0.05$  when compared with that treated with

898 histone alone. 3 biological replicates were used in all experiments except for 0ug/ml and

899 75ug/ml in A) (6 replicates; additional replicates as controls for heparin and anti-histone scFv

900 assays and for CM-pos high and HC in B) (7 replicates; additional replicates performed for

901 comparison with scFv and CM-pos with low histones).

902

903



|                                                                           | Healthy controls | Mild febrile illness | Uncomplicated malaria | Non-malarial coma | CM-neg           | CM-pos           |
|---------------------------------------------------------------------------|------------------|----------------------|-----------------------|-------------------|------------------|------------------|
|                                                                           | (n=21)           | (n=34)               | (n=50)                | (n=10)            | (n=48)           | (n=170)          |
| Age - months median (IQR)                                                 | 82 (41-112)      | 41 (23 – 63)         | 63 (40 – 92)          | 46 (32-72)        | 48 (28-67)       | 42 (32-55)       |
| Female sex - no. (%)                                                      | 8 (38)           | 15 (44)              | 26 (52)               | 1 (10)            | 23 (48)          | 86 (50)          |
| HIV positive - no. (%)                                                    | 0 (0)            | 0 (0)                | 0 (0)                 | 0 (0)             | 4 (8.3)          | 15 (8.8)         |
| Axillary temperature - median (IQR):                                      | 36.8 (36.1-36.8) | 38.2 (37.9- 38.6)    | 38.3 (37.9-39.0)      | 38.6 (38.4-39.0)  | 38.7 (37.7-39.6) | 38.7 (38.7-39.6) |
| Pulse rate - beats/ minute - median (IQR):                                | 117 (104-125)    | 136 (113-154)        | 137 (119-147)         | 140 (119-157)     | 143 (130-164)    | 150 (138-167)    |
| Systolic BP - mmHg - median (IQR):                                        | 112 (103-118)    | 117 (107-123)        | 114 (107-122)         | 100 (94-110)      | 98 (91-105)      | 95 (89-106)      |
| Respiratory rate - breaths/ min - median (IQR):                           | 28 (22-32)       | 32 (28-36)           | 27 (24-32)            | 37 (28-40)        | 40 (36-52)       | 44 (38-52)       |
| Blood glucose - mmol/ L - median (IQR):                                   | 5.3 (4.7-5.8)    | 4.8 (4.4-5.4)        | 5.7 (4.9-6.6)         | 7.45 (6.2-8.8)    | 6.7 (5.5-8.6)    | 6.4 (5.3-7.8)    |
| Blood lactate - mmol/ L - median (IQR):                                   | 1.9 (1.8-2.05)   | 1.7 (1.2-2.2)        | 2.4 (1.9-3.0)         | 3.1 (2.1-5.2)     | 4.0 (3.0-7.1)    | 6.4 (3.4-10.3)   |
| Hb - g/ L - median (IQR):                                                 | 104 (98-111)     | 115 (105-120)        | 93 (76-107)           | 91 (82-92)        | 82 (69-102)      | 64 (51-77)       |
| Platelets - $\times 10^9$ / L - median (IQR):                             | 392 (342-474)    | 331 (239-388)        | 132 (82-185)          | 335 (176-462)     | 133 (57-221)     | 50 (27-84)       |
| Peripheral parasite density ( $\times 10^3/\mu\text{l}$ ) - median (IQR): | 0                | 0                    | 31 (0.7-32)           | 0                 | 48 (5-173)       | 75 (17-273)      |
| Serum Histones - $\mu\text{g}/\text{mL}$ - median (IQR):                  | 1.3 (0.0 – 3.0)  | 0.8 (0.0 – 3.8)      | 1.5 (0.4 – 5.6)       | 3.2 (1.0 – 12.7)  | 6.3 (2.2-23.5)   | 24.6 (8.4-69.4)  |

904  
905  
906  
907  
908  
909  
910  
911  
912  
913  
914  
915  
916  
917  
918  
919  
920  
921  
922  
923  
924  
925  
926

**Table 1.** *Clinical characteristics of the children.* IQR - interquartile range; HIV - Human Immunodeficiency Virus; Hb - Hemoglobin.

927 **Supplementary Material**

928

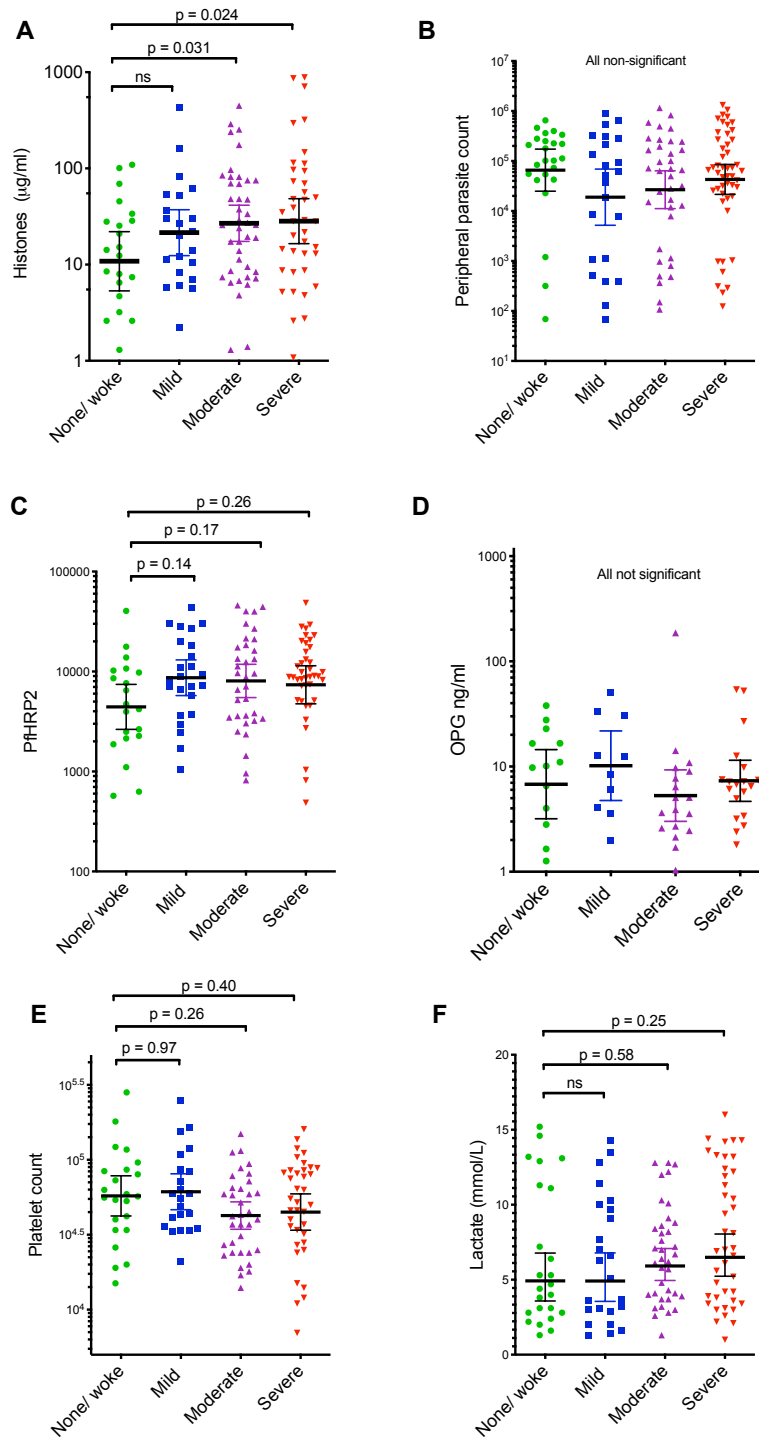

929

930 **Fig S1.** Histones but not other laboratory factors are associated with the degree of brain

931 swelling in CM-pos patients. PfHRP2 = *P. falciparum* histidine rich protein 2; OPG =

932 osteoprotegrin

933

934

935

936

937

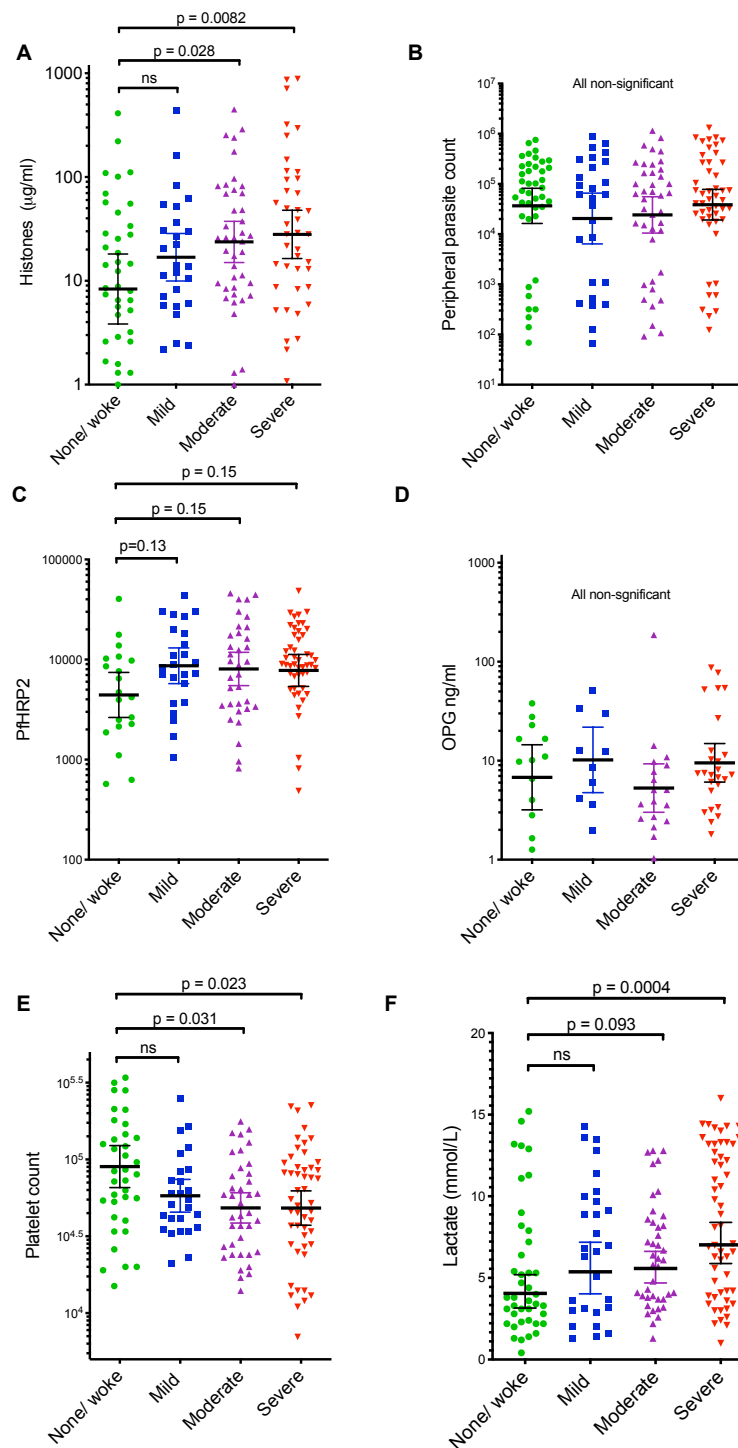

938

939

**Fig S2.** When both CM-pos and CM-neg cases are included, histones platelet count and lactate are associated with the degree of brain swelling.

940

941

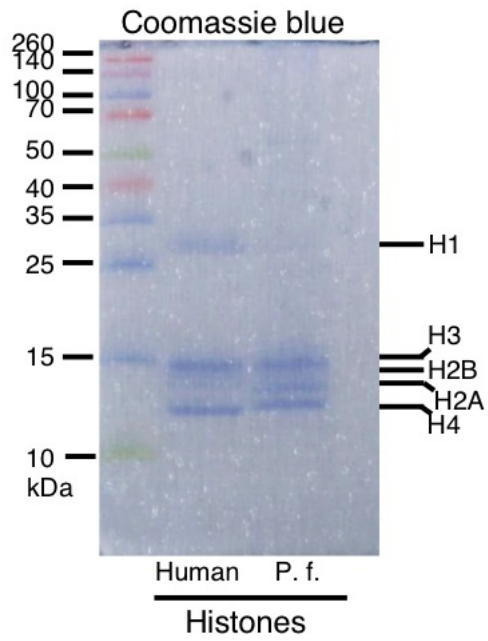

942

943

944 **Fig. S3. Gel showing purified Plasmodium falciparum (P. f.) and human histones.** Different  
945 core histones (H2A, H2B, H3, H4) are identified by size.

946

947

948

949

950

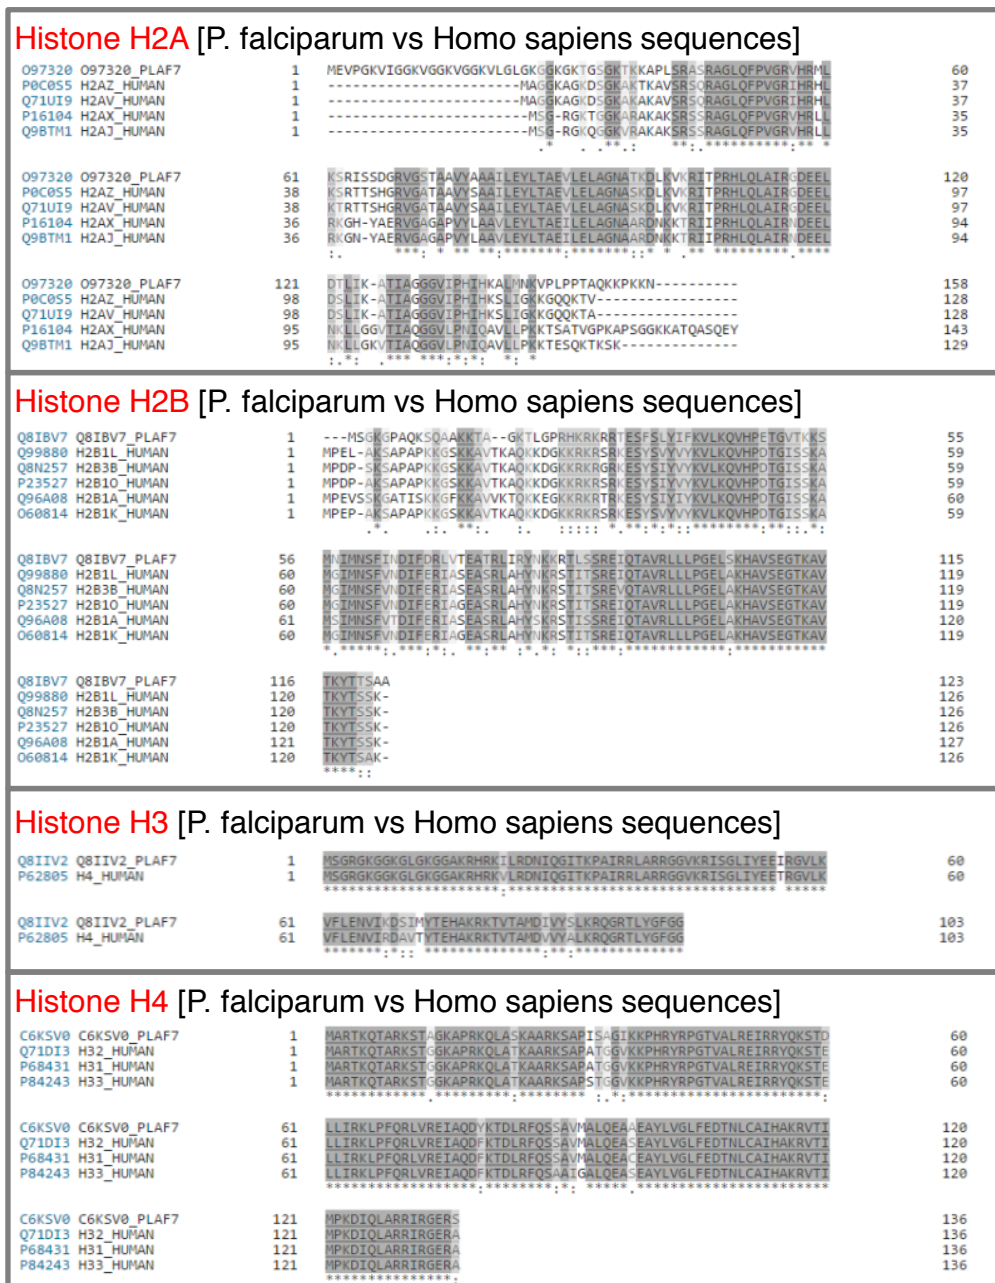

951  
952  
953  
954  
955  
956  
957  
958  
959  
960  
961

**Fig. S4** Alignment of *Homo sapiens* and *P. falciparum* histones. Amino acid sequences of individual histone variant proteins (H2A, H2B, H3 and H4) were compared between *Homo sapiens* and *P. falciparum*. Using these data, we were able to identify heterologous (species-specific) histone peptide sequences (including protein ID numbers) for further downstream analysis. Dark grey = homologous amino acids; light grey and clear = heterologous amino acids.

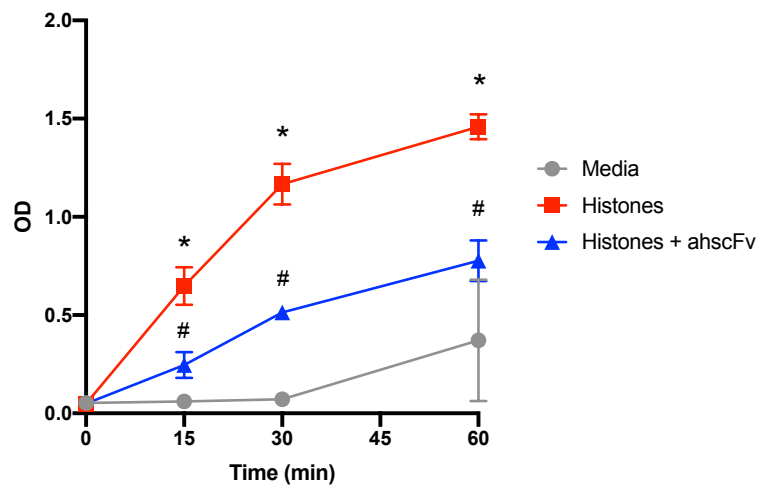

962  
963

964 **Fig S5.** Time-course of barrier disruption of Primary human brain microvascular endothelial  
965 cells (HBMEC) by *P. falciparum* histones in a dual chamber system. Histone concentration  
966 100µg/ml; Antibody concentration 200µg/ml. \* = significant difference from media alone; #  
967 = significant difference from histone alone (i.e. significant protection by ahscFv).

968  
969  
970  
971  
972  
973  
974  
975  
976  
977  
978  
979  
980  
981  
982  
983  
984  
985  
986  
987  
988  
989  
990  
991  
992  
993

| Autopsy Number | Classification | Diagnosis                                      | % Vessels with High Seq. | % Vessels with Strong Histone staining | % Vessels with Leak |
|----------------|----------------|------------------------------------------------|--------------------------|----------------------------------------|---------------------|
| 74             | CM1            | Cerebral malaria                               | 67.1                     | 17.1                                   | 2.86                |
| 79             | CM1            | Cerebral malaria                               | 73.3                     | 6.7                                    | 2.2                 |
| 84             | CM1            | Cerebral malaria                               | 60                       | 0                                      | 0                   |
| 97             | CM1            | Cerebral malaria                               | 82.9                     | 4.3                                    | 1.4                 |
| 100            | CM1            | Cerebral malaria                               | 3.33                     | 0                                      | 0                   |
| 60             | CM2            | Cerebral malaria                               | 55.7                     | 1.4                                    | 1.4                 |
| 62             | CM2            | Cerebral malaria                               | 65.2                     | 0                                      | 1.4                 |
| 63             | CM2            | Cerebral malaria                               | 83                       | 1.4                                    | 7.1                 |
| 64             | CM2            | Cerebral malaria                               | 85.6                     | 2.2                                    | 3.3                 |
| 66             | CM2            | Cerebral malaria                               | 4.3                      | 0                                      | 1.4                 |
| 68             | CM2            | Cerebral malaria                               | 75.7                     | 0                                      | 1.4                 |
| 75             | CM2            | Cerebral malaria                               | 82.9                     | 24.3                                   | 1.4                 |
| 78             | CM2            | Cerebral malaria                               | 22.3                     | 5.7                                    | 13.3                |
| 101            | CM2            | Cerebral malaria                               | 21.4                     | 10                                     | 2.8                 |
| 102            | CM2            | Cerebral malaria                               | 47.8                     | 1.1                                    | 14.4                |
| 43             | CM3            | Giant cell myocarditis                         | 0                        | 0                                      | 5.6                 |
| 49             | CM3            | Ruptured Arteriovenous malformation            | 0                        | 4.4                                    | 1.4                 |
| 54             | CM3            | Skull fracture                                 | 0                        | 0                                      | 10                  |
| 71             | CM3            | Subdural/intracerebral hematomas               | 0                        | 0                                      | 4.4                 |
| 92             | CM3            | Left ventricular failure with pulmonary oedema | 0                        | 0                                      | 0                   |
| 93             | CM3            | Clinical CM; Diagnosis uncertain               | 0                        | 0                                      | 0                   |
| 44             | Non-CM         | Salicylate toxicity - suspected                | 0                        | 1.4                                    | 4.4                 |
| 46             | Non-CM         | Severe (non-malarial) anemia                   | 0                        | 0                                      | 0                   |
| 59             | Non-CM         | Reye's syndrome                                | 0                        | 0                                      | 1.4                 |
| 65             | Non-CM         | Reye's syndrome                                | 0                        | 0                                      | 0                   |
| 88             | Non-CM         | Subdural hematoma, head trauma                 | 0                        | 0                                      | 0                   |

1031

1032 **Table S1. Summary of post-mortem cases.** Clinical pathologist's diagnosis at autopsy and  
 1033 proportion of vessels with each of: (1) high sequestration (seq; sequestration involving >50%  
 1034 of vessel lumen); (2) strong histone staining and; (3) leak (fibrinogen staining adjacent to a  
 1035 vessel).

1036

1037

1038

1039
